# Supplementary material for: Characterization of Influenza D Virus in Danish Calves
Source: MDPI journal article supplement (doi:10.3390/v14020423), 2022-02-18
Supplement: s1 [file s1]

**Table S1.** Information about collection date, number of tested animals and samples, high-throughput real-time PCR results, and IDV single-plex real-time RT-PCR results for the influenza D virus positive herds. IDV, influenza D virus; BCoV, bovine coronavirus.

| Herd ID | Collection date | High-throughput real-time PCR analysis |                                             |                                                                                                                           |                                            | Single-plex real-time RT-PCR analysis                                                                                                                                                                                                                                                                                                                                                                                                                                                                                                                                                 |                                                                                                                                                                                                       |
|---------|-----------------|----------------------------------------|---------------------------------------------|---------------------------------------------------------------------------------------------------------------------------|--------------------------------------------|---------------------------------------------------------------------------------------------------------------------------------------------------------------------------------------------------------------------------------------------------------------------------------------------------------------------------------------------------------------------------------------------------------------------------------------------------------------------------------------------------------------------------------------------------------------------------------------|-------------------------------------------------------------------------------------------------------------------------------------------------------------------------------------------------------|
|         |                 | No. of animal tested                   | Tested as pool (no. of samples in the pool) | Pool tested positive for                                                                                                  | No. of samples tested as individual sample | Individual samples tested positive for                                                                                                                                                                                                                                                                                                                                                                                                                                                                                                                                                | No. of individual samples from pool tested positive for IDV                                                                                                                                           |
| 1       | 06-02-19        | 8                                      | Yes (8/8)                                   | IDV<br><i>Mycoplasma</i><br><i>P. multocida</i>                                                                           | 4                                          | 1. IDV, <i>P. multocida</i><br>2. IDV<br>3. IDV, <i>Mycoplasma</i> , <i>P. multocida</i><br>4. IDV                                                                                                                                                                                                                                                                                                                                                                                                                                                                                    | 4/4<br><br>One sample (3) sequenced<br><a href="#">D/bovine/Denmark/6171103755-1/2019</a>                                                                                                             |
| 1       | 06-03-19        | 4                                      | Yes (4/4)                                   | IDV<br><i>P. multocida</i><br><i>T. pyogenes</i>                                                                          | 0                                          | NA                                                                                                                                                                                                                                                                                                                                                                                                                                                                                                                                                                                    | 1/4<br><br>No sample sequenced                                                                                                                                                                        |
| 2       | 01-03-19        | 10                                     | Yes (10/10)                                 | IDV<br><i>M. bovis</i><br><i>M. haemolytica</i><br><i>P. multocida</i>                                                    | 0                                          | NA                                                                                                                                                                                                                                                                                                                                                                                                                                                                                                                                                                                    | 10/10<br><br>One sample sequenced<br><a href="#">D/bovine/Denmark/5246407608-2/2019</a>                                                                                                               |
| 3       | 12-03-19        | 8                                      | Yes (8/8)                                   | IDV<br><i>M. haemolytica</i><br><i>H. somni</i><br><i>P. multocida</i>                                                    | 0                                          | NA                                                                                                                                                                                                                                                                                                                                                                                                                                                                                                                                                                                    | 3/8<br><br>One sample sequenced<br><a href="#">D/bovine/Denmark/5358904609-3/2019</a>                                                                                                                 |
| 4       | 05-04-19        | 10                                     | Yes (10/10)                                 | BCoV<br>IDV<br><i>M. bovis</i><br><i>Mycoplasma</i><br><i>M. haemolytica</i><br><i>P. multocida</i><br><i>T. pyogenes</i> | 0                                          | NA                                                                                                                                                                                                                                                                                                                                                                                                                                                                                                                                                                                    | 6/10<br><br>One sample sequenced<br><a href="#">D/bovine/Denmark/1173303525-4/2019</a>                                                                                                                |
| 5       | 15-01-19        | 10                                     | Yes (10/10)                                 | IDV<br><i>M. bovis</i><br><i>Mycoplasma</i><br><i>M. haemolytica</i><br><i>P. multocida</i>                               | 0                                          | NA                                                                                                                                                                                                                                                                                                                                                                                                                                                                                                                                                                                    | 3/10<br><br>Three samples sequenced<br><a href="#">D/bovine/Denmark/4559602762-5/2019</a><br><a href="#">D/bovine/Denmark/5022903340-5/2019</a><br><a href="#">D/bovine/Denmark/5161205135-5/2019</a> |
| 5       | 15-01-19        | 15                                     | Yes (9/15)                                  | IDV<br><i>M. bovis</i><br><i>Mycoplasma</i><br><i>M. haemolytica</i><br><i>P. multocida</i>                               | 15                                         | 1. IDV, <i>M. haemolytica</i> , <i>H. somni</i> , <i>P. multocida</i> , <i>T. pyogenes</i><br>2. <i>M. bovis</i> , <i>Mycoplasma</i> , <i>M. haemolytica</i> , <i>H. somni</i> , <i>P. multocida</i><br>3. IDV, <i>M. haemolytica</i> , <i>H. somni</i> , <i>P. multocida</i><br>4. <i>H. somni</i> , <i>P. multocida</i><br>5. IDV, <i>M. bovis</i> , <i>P. multocida</i><br>6. IDV, <i>Mycoplasma</i> , <i>M. haemolytica</i> , <i>H. somni</i> , <i>P. multocida</i><br>7. IDV<br>8. IDV, <i>P. multocida</i><br>9. IDV, <i>Mycoplasma</i> , <i>H. somni</i> , <i>P. multocida</i> | 7/8<br><br>One sample (10) sequenced<br><a href="#">D/bovine/Denmark/5195604714-5/2019</a>                                                                                                            |

|   |          |   |           |                                                                                                                |                                                                                                                                                                                                                                                                                                                                                         |                                                                                                                                                                                                                                                             |                                                                                           |
|---|----------|---|-----------|----------------------------------------------------------------------------------------------------------------|---------------------------------------------------------------------------------------------------------------------------------------------------------------------------------------------------------------------------------------------------------------------------------------------------------------------------------------------------------|-------------------------------------------------------------------------------------------------------------------------------------------------------------------------------------------------------------------------------------------------------------|-------------------------------------------------------------------------------------------|
|   |          |   |           |                                                                                                                | 10. IDV, <i>M. haemolytica</i> , <i>H. somni</i><br>11. Neg<br>12. IDV, <i>M. haemolytica</i> , <i>P. multocida</i><br>13. IDV, <i>M. bovis</i> , <i>Mycoplasma</i> , <i>H. somni</i> , <i>P. multocida</i><br>14. IDV, <i>M. bovis</i> , <i>M. haemolytica</i> , <i>P. multocida</i> , <i>T. pyogenes</i><br>15. <i>H. somni</i> , <i>P. multocida</i> |                                                                                                                                                                                                                                                             |                                                                                           |
| 5 | 15-01-19 | 3 | Yes (2/3) | IDV<br><i>Mycoplasma</i><br><i>M. haemolytica</i><br><i>H. somni</i><br><i>P. multocida</i>                    | 3                                                                                                                                                                                                                                                                                                                                                       | 1. IDV<br>2. <i>Mycoplasma</i> , <i>M. haemolytica</i> , <i>H. somni</i> , <i>P. multocida</i><br>3. IDV, <i>M. haemolytica</i> , <i>P. multocida</i>                                                                                                       | 2/3<br><br>No sample sequenced                                                            |
| 5 | 20-02-19 | 9 | Yes (9/9) | IDV<br><i>M. bovis</i><br><i>Mycoplasma</i><br><i>P. multocida</i>                                             | 0                                                                                                                                                                                                                                                                                                                                                       | NA                                                                                                                                                                                                                                                          | 2/9<br><br>One sample sequenced<br><a href="#">D/bovine/Denmark/5195604790-5/2019</a>     |
| 5 | 24-04-19 | 6 | Yes (6/6) | IDV<br><i>M. bovis</i><br><i>Mycoplasma</i><br><i>M. haemolytica</i><br><i>H. somni</i><br><i>P. multocida</i> | 0                                                                                                                                                                                                                                                                                                                                                       | NA                                                                                                                                                                                                                                                          | 2/6<br><br>One sample sequenced<br><a href="#">D/bovine/Denmark/5224403563-5/2019</a>     |
| 6 | 08-01-19 | 5 | Yes (5/5) | IDV<br><i>M. haemolytica</i><br><i>H. somni</i><br><i>P. multocida</i>                                         | 5                                                                                                                                                                                                                                                                                                                                                       | 1. IDV, <i>T. pyogenes</i><br>2. IDV, <i>M. bovis</i> , <i>Mycoplasma</i> , <i>M. haemolytica</i> , <i>H. somni</i> , <i>P. multocida</i><br>3. <i>M. bovis</i> , <i>H. somni</i><br>4. <i>Mycoplasma</i> , <i>M. haemolytica</i><br>5. <i>P. multocida</i> | 1/1<br><br>One sample (1) sequenced<br><a href="#">D/bovine/Denmark/3313408142-6/2020</a> |
| 6 | 08-01-19 | 2 | No        | NA                                                                                                             | 2                                                                                                                                                                                                                                                                                                                                                       | 1. IDV, <i>Mycoplasma</i> , <i>H. somni</i> , <i>P. multocida</i> , <i>T. pyogenes</i><br>2. IDV, <i>M. haemolytica</i> , <i>H. somni</i> , <i>P. multocida</i>                                                                                             | 0/0<br><br>No sample sequenced                                                            |
| 6 | 05-02-19 | 5 | Yes (5/5) | IDV<br><i>M. haemolytica</i><br><i>P. multocida</i>                                                            | 0                                                                                                                                                                                                                                                                                                                                                       | NA                                                                                                                                                                                                                                                          | 0/0<br><br>No sample sequenced                                                            |
| 6 | 05-02-19 | 5 | Yes (5/5) | IDV<br><i>Mycoplasma</i><br><i>M. haemolytica</i><br><i>P. multocida</i>                                       | 0                                                                                                                                                                                                                                                                                                                                                       | NA                                                                                                                                                                                                                                                          | 0/0<br><br>No sample sequenced                                                            |
| 7 | 08-01-20 | 1 | No        | NA                                                                                                             | 1                                                                                                                                                                                                                                                                                                                                                       | 1. IDV                                                                                                                                                                                                                                                      | 1/1<br><br>No sample sequenced                                                            |
| 7 | 05-02-20 | 5 | Yes (5/5) | IDV<br><i>M. bovis</i><br><i>Mycoplasma</i><br><i>M. haemolytica</i><br><i>P. multocida</i>                    | 0                                                                                                                                                                                                                                                                                                                                                       | NA                                                                                                                                                                                                                                                          | 0/0<br><br>No sample sequenced                                                            |
| 7 | 05-02-20 | 5 | Yes (5/5) | IDV<br><i>M. bovis</i><br><i>Mycoplasma</i>                                                                    | 0                                                                                                                                                                                                                                                                                                                                                       | NA                                                                                                                                                                                                                                                          | 0/0<br><br>No sample sequenced                                                            |

|    |          |   |                                              |                                                                                                                                      |   |                                                                                                                                                                                                                                |                                                                                       |
|----|----------|---|----------------------------------------------|--------------------------------------------------------------------------------------------------------------------------------------|---|--------------------------------------------------------------------------------------------------------------------------------------------------------------------------------------------------------------------------------|---------------------------------------------------------------------------------------|
|    |          |   | <i>M. haemolytica</i><br><i>P. multocida</i> |                                                                                                                                      |   |                                                                                                                                                                                                                                |                                                                                       |
| 7  | 05-02-20 | 5 | Yes (5/5)                                    | IDV<br><i>M. haemolytica</i><br><i>P. multocida</i>                                                                                  | 0 | NA                                                                                                                                                                                                                             | 0/0<br><br>No sample sequenced                                                        |
| 7  | 12-03-20 | 5 | Yes (5/5)                                    | BCoV<br>IDV<br><i>Mycoplasma</i><br><i>M. haemolytica</i><br><i>P. multocida</i>                                                     | 0 | NA                                                                                                                                                                                                                             | 5/5<br><br>One sample sequenced<br><a href="#">D/bovine/Denmark/3727003200-7/2020</a> |
| 8  | 06-03-20 | 5 | Yes (5/5)                                    | IDV<br><i>M. bovis</i><br><i>Mycoplasma</i><br><i>M. haemolytica</i><br><i>H. somni</i><br><i>P. multocida</i><br><i>T. pyogenes</i> | 1 | 1. Neg                                                                                                                                                                                                                         | 3/5<br><br>One sample sequenced<br><a href="#">D/bovine/Denmark/5256205576-8/2020</a> |
| 9  | 17-12-19 | 1 | No                                           | NA                                                                                                                                   | 1 | 1. IDV, <i>H. somni</i> , <i>P. multocida</i>                                                                                                                                                                                  | 1/1<br>No sample sequenced                                                            |
| 9  | 17-12-19 | 5 | Yes (5/5)                                    | IDV<br><i>M. bovis</i><br><i>Mycoplasma</i><br><i>M. haemolytica</i><br><i>P. multocida</i><br><i>T. pyogenes</i>                    | 2 | 1. <i>M. haemolytica</i> , <i>P. multocida</i><br>2. <i>M. bovis</i> , <i>Mycoplasma</i> , <i>H. somni</i>                                                                                                                     | 0/0<br><br>No sample sequenced                                                        |
| 9  | 17-12-19 | 5 | Yes (5/5)                                    | IDV<br><i>P. multocida</i>                                                                                                           | 2 | 1. <i>M. bovis</i> , <i>Mycoplasma</i> , <i>H. somni</i> , <i>P. multocida</i><br>2. <i>M. haemolytica</i>                                                                                                                     | 0/0<br><br>No sample sequenced                                                        |
| 9  | 11-02-20 | 5 | Yes (5/5)                                    | IDV<br><i>M. bovis</i><br><i>Mycoplasma</i><br><i>P. multocida</i>                                                                   | 0 | NA                                                                                                                                                                                                                             | 4/5<br><br>One sample sequenced<br><a href="#">D/bovine/Denmark/5995505714-9/2020</a> |
| 9  | 11-02-20 | 5 | Yes (5/5)                                    | IDV<br><i>M. bovis</i><br><i>Mycoplasma</i><br><i>P. multocida</i>                                                                   | 0 | NA                                                                                                                                                                                                                             | 0/0<br><br>No sample sequenced                                                        |
| 9  | 05-03-20 | 5 | Yes (5/5)                                    | IDV<br><i>M. bovis</i><br><i>Mycoplasma</i><br><i>M. haemolytica</i><br><i>H. somni</i><br><i>P. multocida</i><br><i>T. pyogenes</i> | 0 | NA                                                                                                                                                                                                                             | 0/0<br><br>No sample sequenced                                                        |
| 10 | 16-01-20 | 1 | No                                           | NA                                                                                                                                   | 1 | 1. IDV, <i>Mycoplasma</i> , <i>H. somni</i> , <i>P. multocida</i>                                                                                                                                                              | 1/1<br>No sample sequenced                                                            |
| 10 | 16-01-20 | 6 | Yes (4/6)                                    | IDV<br><i>M. bovis</i><br><i>Mycoplasma</i>                                                                                          | 6 | 1. <i>Mycoplasma</i> , <i>H. somni</i> , <i>P. multocida</i><br>2. IDV, <i>M. haemolytica</i> , <i>H. somni</i> , <i>P. multocida</i><br>3. IDV, <i>M. bovis</i> , <i>Mycoplasma</i> , <i>M. haemolytica</i> , <i>H. somni</i> | 1/1<br><br>One sample sequenced                                                       |

|    |          |    |                                                                 |                                                                                                                   |                                                                                                                                                            |                                     |                                                                        |
|----|----------|----|-----------------------------------------------------------------|-------------------------------------------------------------------------------------------------------------------|------------------------------------------------------------------------------------------------------------------------------------------------------------|-------------------------------------|------------------------------------------------------------------------|
|    |          |    | <i>M. haemolytica</i><br><i>H. somni</i><br><i>P. multocida</i> |                                                                                                                   | 4. <i>M. bovis</i> , <i>M. haemolytica</i> , <i>H. somni</i> , <i>P. multocida</i><br>5. Neg<br>6. <i>M. bovis</i> , <i>H. somni</i> , <i>P. multocida</i> | D/bovine/Denmark/1052304114-10/2020 |                                                                        |
| 10 | 10-03-20 | 4  | Yes (4/4)                                                       | IDV<br><i>M. bovis</i><br><i>Mycoplasma</i><br><i>M. haemolytica</i><br><i>H. somni</i><br><i>P. multocida</i>    | 0                                                                                                                                                          | NA                                  | 0/0<br><br>No sample sequenced                                         |
| 10 | 10-03-20 | 5  | Yes (5/5)                                                       | IDV<br><i>Mycoplasma</i><br><i>M. haemolytica</i><br><i>H. somni</i><br><i>P. multocida</i>                       | 0                                                                                                                                                          | NA                                  | 0/0<br><br>No sample sequenced                                         |
| 11 | 09-10-19 | 5  | Yes (5/5)                                                       | IDV<br><i>Mycoplasma</i><br><i>H. somni</i>                                                                       | 0                                                                                                                                                          | NA                                  | 4/5<br><br>One sample sequenced<br>D/bovine/Denmark/3058506689-11/2019 |
| 12 | 16-01-19 | 10 | Yes (10/10)                                                     | IDV<br><i>M. bovis</i><br><i>Mycoplasma</i><br><i>M. haemolytica</i><br><i>P. multocida</i><br><i>T. pyogenes</i> | 0                                                                                                                                                          | NA                                  | 6/10<br><br>No sample sequenced                                        |
| 13 | 03-11-15 | 0  | No                                                              | NA                                                                                                                | 0                                                                                                                                                          | NA                                  | 1/1<br>One sample sequenced<br>D/bovine/Denmark/47398-3622/2015        |

Table S2. Accession numbers for the sequences of this study.

| Strain                             | PB2      | PB1      | P3       | HEF      | NP       | P42      | NS       |
|------------------------------------|----------|----------|----------|----------|----------|----------|----------|
| D/bovine/Denmark/6171103755-1/2019 | OM468189 | OM468201 | OM468224 | OM468243 | OM468260 | OM468270 | OM468297 |
| D/bovine/Denmark/5246407608-2/2019 | OM468185 | OM468202 | OM468217 | OM468246 | OM468253 | OM468265 | OM468283 |
| D/bovine/Denmark/5358904609-3/2019 | OM468188 | OM468203 | OM468227 | OM468247 | OM468259 | OM468269 | OM468281 |
| D/bovine/Denmark/1173303525-4/2019 | OM468187 | OM468207 | OM468226 | OM468242 | OM468254 | OM468267 | OM468282 |
| D/bovine/Denmark/4559602762-5/2019 | OM468196 | OM468211 | OM468218 | OM468240 | OM468258 | OM468274 | OM468290 |
| D/bovine/Denmark/5022903340-5/2019 | OM468193 | OM468208 | OM468219 | OM468237 | OM468256 | OM468275 | OM468287 |

|                                     |          |          |          |          |          |          |          |
|-------------------------------------|----------|----------|----------|----------|----------|----------|----------|
| D/bovine/Denmark/5161205135-5/2019  | OM468194 | OM468209 | OM468220 | OM468239 | OM468257 | OM468273 | OM468288 |
| D/bovine/Denmark/5195604714-5/2019  | OM468195 | OM468210 | OM468221 | OM468238 | OM468255 | OM468276 | OM468289 |
| D/bovine/Denmark/5195604790-5/2019  | OM468190 | OM468212 | OM468225 | OM468245 | OM468261 | OM468272 | OM468284 |
| D/bovine/Denmark/5224403563-5/2019  | OM468191 | OM468213 | OM468223 | OM468244 | OM468262 | OM468271 | OM468285 |
| D/bovine/Denmark/3313408142-6/2020  | OM468186 | OM468206 | OM468228 | OM468241 | OM468264 | OM468266 | OM468286 |
| D/bovine/Denmark/3727003200-7/2020  | OM468197 | OM468214 | OM468229 | OM468233 | OM468252 | OM468277 | OM468292 |
| D/bovine/Denmark/5256205576-8/2020  | OM468198 | OM468215 | OM468230 | OM468234 | OM468249 | OM468278 | OM468293 |
| D/bovine/Denmark/5995505714-9/2020  | OM468200 | OM468216 | OM468232 | OM468236 | OM468251 | OM468280 | OM468295 |
| D/bovine/Denmark/1052304114-10/2020 | OM468199 | OM468205 | OM468231 | OM468235 | OM468250 | OM468279 | OM468294 |
| D/bovine/Denmark/3058506689-11/2019 | OM468192 | OM468204 | OM468222 | OM468248 | OM468263 | OM468268 | OM468291 |
| D/bovine/Denmark/47398-3622/2015    | -        | -        | -        | OM468296 | -        | -        | -        |

**Table S3.** Predicted N-linked glycosylation sites of HEF for D/660 influenza D viruses (from Figure 1).

| D/660 Sequences                          | Amino acid positions |            |             |             |             |             |             |             |             |             |             |
|------------------------------------------|----------------------|------------|-------------|-------------|-------------|-------------|-------------|-------------|-------------|-------------|-------------|
|                                          | 28<br>NESF           | 54<br>NVTK | 133<br>NWSP | 146<br>NWTQ | 249<br>NKTA | 254<br>NTTG | 346<br>NATE | 390<br>NDTV | 513<br>NDTN | 562<br>NISM | 613<br>NGSA |
| D/bovine/Italy/35490/2019                | +                    | +++        | ---         | +           | ++          | /           | +           | -           | +           | -           | +           |
| D/bovine/Italy/28300/2019                | +                    | +++        | ---         | +           | NRTA<br>++  | /           | +           | -           | +           | -           | +           |
| D/bovine/Italy/28145/2019                | +                    | +++        | ---         | +           | ++          | /           | +           | -           | +           | -           | +           |
| D/bovine/Italy/45097/2019                | +                    | +++        | ---         | +           | ++          | /           | +           | -           | +           | -           | +           |
| D/bovine/Denmark/3727003200-7/2020-03-12 | +                    | +++        | ---         | +           | ++          | /           | +           | -           | +           | -           | +           |
| D/bovine/Italy/19RS176-11/2018           | +                    | +++        | ---         | +           | ++          | /           | +           | -           | +           | -           | +           |
| D/bovine/Denmark/5995505714-9/2020-02-11 | +                    | +++        | ---         | +           | ++          | /           | +           | -           | +           | -           | +           |

|                                           |   |     |     |   |            |   |   |   |   |   |   |
|-------------------------------------------|---|-----|-----|---|------------|---|---|---|---|---|---|
| D/bovine/Denmark/1052304114-10/2020-01-16 | + | +++ | --- | + | ++         | / | + | - | + | - | + |
| D/bovine/Denmark/5256205576-8/2020-03-06  | + | +++ | --- | + | ++         | / | + | - | + | - | + |
| D/bovine/Quebec/5E-H/2018                 | + | +++ | --- | + | ++         | - | + | - | + | - | + |
| D/bovine/Quebec/3E-H/2018                 | + | +++ | --- | + | ++         | / | + | - | + | - | + |
| D/bovine/Quebec/1M-H/2019                 | + | +++ | --- | + | /          | / | + | - | + | - | + |
| D/bovine/Mississippi/C00009P/2014         | + | +++ | --- | + | ++         | / | + | - | + | - | + |
| D/bovine/Mississippi/C00002N/2014         | + | +++ | --- | + | ++         | / | + | - | + | - | + |
| D/bovine/Nebraska/9-5/2012                | + | +++ | --- | + | ++         | / | + | - | + | - | + |
| D/bovine/Oklahoma/660/2013                | + | +++ | --- | + | NKTX<br>++ | / | + | - | + | - | + |
| D/bovine/Mexico/S7/2015                   | + | +++ | --- | + | ++         | / | + | - | + | - | + |
| D/bovine/Mexico/S56/2015                  | + | +++ | --- | + | ++         | / | + | - | + | - | + |
| D/bovine/Quebec/3M-B/2020                 | + | +++ | --- | + | ++         | / | + | - | + | - | + |
| D/bovine/France/2986/2012                 | + | +++ | --- | + | /          | / | + | - | / | - | + |

+ indicates prediction of an N-glycosylated site. - indicates a non-glycosylated site. / indicates no prediction of a glycosylated site.  
Definition according to <https://services.healthtech.dtu.dk/service.php?NetNGlyc-1.0>:  
+ Potential > 0.5, ++ Potential > 0.5 and Jury agreement (9/9) or Potential > 0.75, +++ Potential > 0.75 and Jury agreement, ++++ Potential > 0.90 and Jury agreement.  
- Potential < 0.5, -- Potential < 0.5 and Jury agreement (all nine < 0.5), --- Potential < 0.32 and Jury agreement.

**Table S4.** Predicted N-linked glycosylation sites of HEF for D/OK influenza D viruses (from Figure 1).

| D/OK Sequences                      | Amino acid positions |            |             |             |             |             |             |             |             |             |
|-------------------------------------|----------------------|------------|-------------|-------------|-------------|-------------|-------------|-------------|-------------|-------------|
|                                     | 28<br>NESF           | 54<br>NVTK | 133<br>NWSP | 146<br>NWTQ | 249<br>NKTA | 346<br>NATE | 390<br>NDTV | 513<br>NDTN | 562<br>NLMS | 613<br>NGSA |
| D/bovine/Italy/16RS2359/2016 (+1)   | +                    | +++        | ---         | +           | ++          | +           | -           | +           | -           | +           |
| D/bovine/Italy/4128547/2018 (+1)    | +                    | +++        | ---         | +           | ++          | +           | -           | +           | -           | +           |
| D/bovine/Italy/18RS182-14/2017 (+1) | +                    | +++        | ---         | +           | ++          | +           | -           | +           | -           | +           |
| D/bovine/Italy/59542/2018 (+1)      | +                    | +++        | ---         | +           | ++          | +           | -           | +           | -           | +           |
| D/bovine/Italy/50543-3/2018 (+1)    | +                    | +++        | ---         | +           | ++          | +           | -           | +           | -           | +           |
| D/swine/Italy/218655/2017 (+1)      | +                    | +++        | ---         | +           | ++          | +           | -           | /           | -           | +           |
| D/bovine/Italy/37760/2019 (+1)      | +                    | /          | ---         | NWTH<br>+   | ++          | +           | -           | +           | -           | +           |
| D/swine/Italy/173287-4/2016 (+1)    | +                    | +++        | ---         | ++          | +++         | +           | -           | +           | -           | +           |
| D/swine/Italy/254578/2015 (+1)      | +                    | +++        | ---         | +           | ++          | +           | -           | -           | -           | +           |

|                                           |   |     |     |   |            |   |   |   |           |   |
|-------------------------------------------|---|-----|-----|---|------------|---|---|---|-----------|---|
| D/bovine/Italy/31525/2018 (+1)            | + | +++ | --- | + | ++         | + | - | + | -         | + |
| D/bovine/Italy/18RS182-13/2017 (+1)       | + | +++ | --- | + | ++         | + | - | + | -         | + |
| D/bovine/Italy/18RS182-8/2017 (+1)        | + | +++ | --- | + | ++         | + | - | + | -         | + |
| D/bovine/Italy/16RS2581-9/2016 (+1)       | + | +++ | --- | + | ++         | + | - | + | -         | + |
| D/bovine/France/5920/2014 (+1)            | + | +++ | --- | + | ++         | + | - | + | -         | + |
| D/bovine/Italy/46484/2015 (+1)            | + | +++ | --- | + | ++         | + | - | + | -         | + |
| D/bovine/Denmark/5195604790-5/2019-02-20  | + | /   | --- | + | ++         | + | - | + | -         | + |
| D/bovine/Denmark/5224403563-5/2019-04-24  | + | +++ | --- | + | ++         | + | - | + | -         | + |
| D/bovine/Denmark/6171103755-1/2019-02-06  | + | +++ | --- | + | ++         | + | - | + | -         | + |
| D/bovine/Denmark/1173303525-4/2019-04-05  | + | +++ | --- | + | ++         | + | - | + | -         | + |
| D/bovine/Denmark/3313408142-6/2020-01-08  | + | +++ | --- | + | ++         | + | - | + | -         | + |
| D/bovine/Denmark/3058506689-11/2019-10-09 | + | +++ | --- | + | ++         | + | - | + | -         | + |
| D/bovine/Denmark/4559602762-5/2019-01-15  | + | +++ | --- | + | ++         | + | - | + | -         | + |
| D/bovine/Denmark/5195604714-5/2019-01-15  | + | +++ | --- | + | ++         | + | - | + | -         | + |
| D/bovine/Denmark/5161205135-5/2019-01-15  | + | +++ | --- | + | ++         | + | - | + | -         | + |
| D/bovine/Denmark/5022903340-5/2019-01-15  | + | +++ | --- | + | ++         | + | - | + | -         | + |
| D/bovine/Denmark/5358904609-3/2019-03-12  | + | +++ | --- | + | ++         | + | - | + | -         | + |
| D/bovine/Denmark/5246407608-2/2019-03-01  | + | +++ | --- | + | ++         | + | - | / | -         | + |
| D/bovine/Denmark/47398-3622/2015-11-03    | + | +++ | --- | + | ++         | + | - | / | -         | + |
| D/bovine/Italy/1/2014 (+1)                | + | +++ | --- | + | ++         | + | - | + | -         | + |
| D/swine/Italy/18VIR6833/2015 (+1)         | + | +++ | --- | + | ++         | + | - | + | -         | + |
| D/bovine/Italy/18RS182-16/2018 (+1)       | + | +++ | --- | + | ++         | + | - | + | -         | + |
| D/bovine/Italy/18RS182-10/2017 (+1)       | + | +++ | --- | + | ++         | + | - | + | -         | + |
| D/swine/Italy/354017/2015 (+1)            | + | +++ | --- | + | ++         | / | - | + | -         | + |
| D/bovine/Northern Ireland/24280/2017 (+1) | + | +++ | --- | + | ++         | + | - | + | -         | + |
| D/bovine/Italy/40574/2018 (+1)            | + | +++ | --- | + | ++         | + | - | + | -         | + |
| D/bovine/Mississippi/C00030P/2014 (+1)    | + | +++ | --- | + | NKTT<br>++ | + | - | + | -         | + |
| D/bovine/Mississippi/C00020N/2014 (+1)    | + | +++ | --- | + | NKTT<br>++ | + | - | + | -         | + |
| D/bovine/Mississippi/C00135N/2014 (+1)    | + | +++ | --- | + | NKTT<br>++ | + | - | + | -         | + |
| D/bovine/Mississippi/C00162N/2015 (+1)    | + | +++ | --- | + | NKTT<br>++ | + | - | + | -         | + |
| D/bovine/Mississippi/C00165P/2015 (+1)    | + | +++ | --- | + | NKTT<br>++ | + | - | + | NISM<br>- | + |
| D/bovine/Kansas/1-35/2010 (+1)            | + | +++ | --- | + | NKTT<br>++ | + | - | + | NISM<br>- | + |
| D/bovine/Minnesota/729/2013 (+1)          | + | +++ | --- | + | NKTT<br>++ | + | - | + | NISM<br>- | + |
| D/bovine/Minnesota/628/2013 (+1)          | + | +++ | --- | + | NKTT<br>++ | + | - | + | NISM<br>- | + |
| D/bovine/Guangdong/YC/2017 (+1)           | + | +++ | --- | + | NKTT<br>++ | / | - | + | NISM<br>- | + |
| D/bovine/Guangdong/SK/2018 (+1)           | + | +++ | --- | + | NKTT<br>++ | + | - | + | NISM<br>- | + |

|                                        |   |     |     |   |            |   |   |   |           |   |
|----------------------------------------|---|-----|-----|---|------------|---|---|---|-----------|---|
| D/bovine/Shandong/Y217/2014 (+1)       | + | +++ | --- | + | NKTT<br>++ | + | - | + | NISM<br>- | + |
| D/bovine/Shandong/Y125/2014 (+1)       | + | +++ | --- | + | NKTT<br>++ | + | - | + | NISM<br>- | + |
| D/bovine/Mississippi/C00148N/2014 (+1) | + | /   | --- | + | ++         | + | - | + | NISM<br>- | + |
| D/bovine/Texas/72/2017 (+1)            | + | +++ | --- | + | ++         | + | - | + | NISM<br>- | + |

+ indicates prediction of an N-glycosylated site. - indicates a non-glycosylated site. / indicates no prediction of a glycosylated site.

Definition according to <https://services.healthtech.dtu.dk/service.php?NetNGlyc-1.0>:

+ Potential > 0.5, ++ Potential > 0.5 and Jury agreement (9/9) or Potential > 0.75, +++ Potential > 0.75 and Jury agreement, ++++ Potential > 0.90 and Jury agreement.

- Potential < 0.5, -- Potential < 0.5 and Jury agreement (all nine < 0.5), --- Potential < 0.32 and Jury agreement.
